# Supplementary material
Source: PubMed Central journal article supplement (PMC11161028)
Supplement: NIHMS1551977-supplement-4.pdf [file NIHMS1551977-supplement-4.pdf]

# Supplementary 4

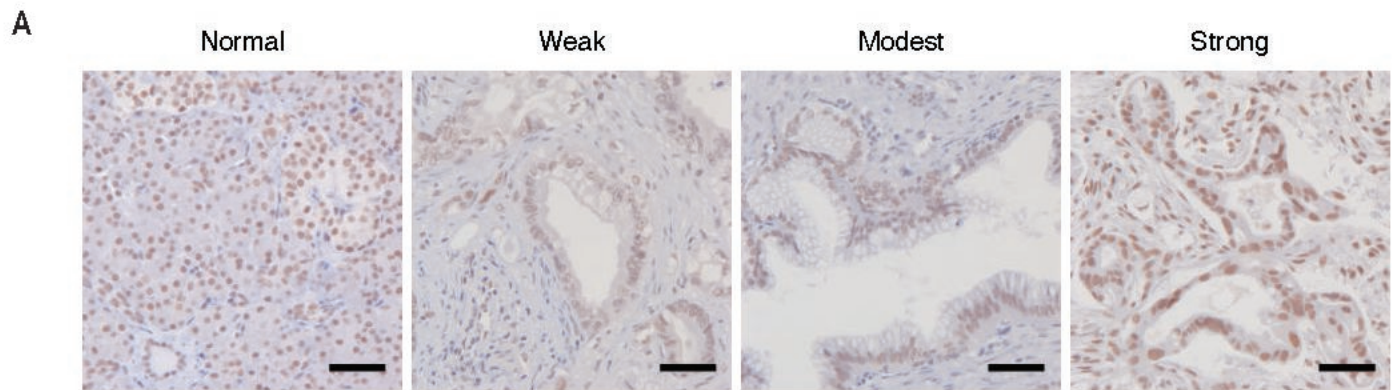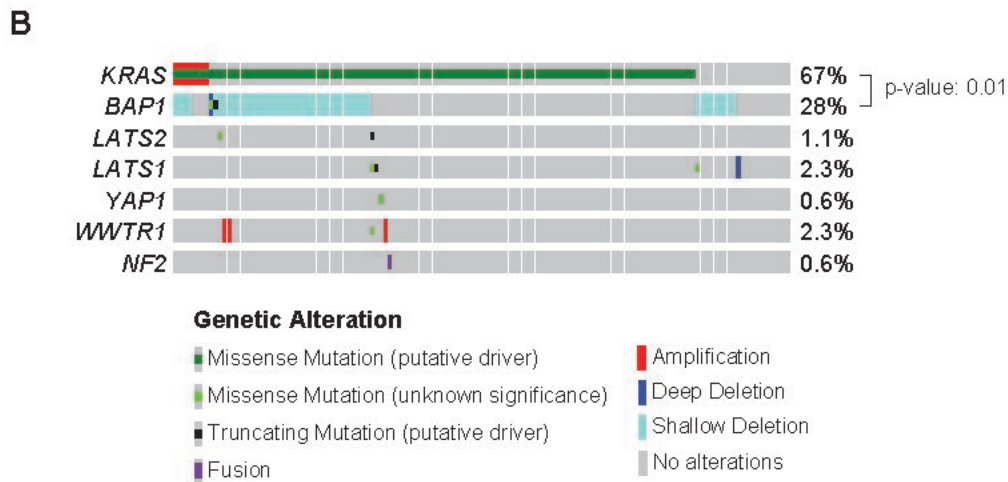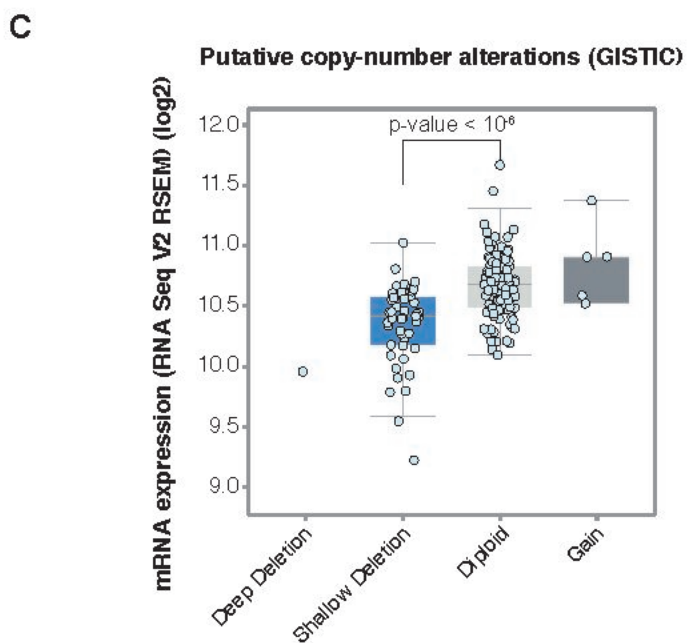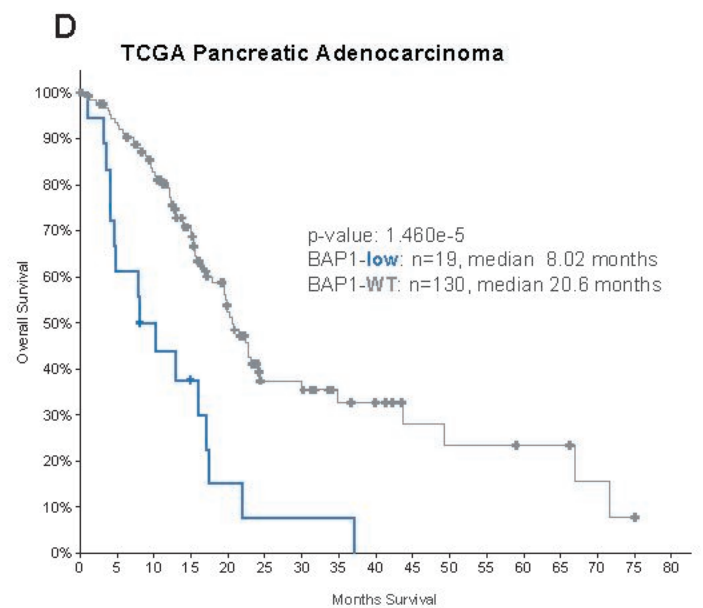

**Fig. S4. Evaluation of BAP1 expression in PDAC patients.**

(A) BAP1 IHC on 7 normal and 48 PDAC samples. Samples were scored based on BAP1 expression. BAP1 on a normal sample is detected in acinar cells, pancreatic ducts, and islets of Langerhans (n=8). Bar = 50  $\mu$ M

(B) Genetic alterations in BAP1, KRAS and representative core hippo pathway members from TCGA pancreatic cancer dataset

(C) BAP1 copy number alterations and expression plotted from GISTIC.

(D) Kaplan Meier survival curve of patients with normal or low BAP1 low expression (patients with homozygous deletions and/or BAP1 mRNA expression less than 1.5 standard deviations below the mean).
