# Supplementary material
Source: PubMed Central journal article supplement (PMC11161028)
Supplement: NIHMS1551977-supplement-6.pdf [file NIHMS1551977-supplement-6.pdf]

**Fig. S6. Variable YAP/TAZ upregulation and decreased LATS2 expression in BAP1 deficient uveal melanoma cell lines.** Immunoblots of BAP1 deficient uveal melanoma cell lines using antibodies against indicated proteins.  $\alpha$ -Actin served as a loading control.
